# Supplementary material for: Lateral hypothalamic LEPR neurons drive appetitive but not consummatory behaviors
Source: PubMed Central journal article supplement — Cell Rep. Author manuscript; Available in PMC 2021 Sep 7. (PMC8423025; doi:10.1016/j.celrep.2021.109615), 2021-08-24
Supplement: NIHMS1735657-supplement-1.pdf [file NIHMS1735657-supplement-1.pdf]

**Cell Reports, Volume 36**

**Supplemental information**

**Lateral hypothalamic LEPR neurons drive  
appetitive but not consummatory behaviors**

**Justin N. Siemian, Miguel A. Arenivar, Sarah Sarsfield, Cara B. Borja, Charity N. Russell, and Yeka Aponte**

**Table 1. Statistical values and group sizes for main figures. Related to Figures 1 - 5.**

| Figure                          | Test                                                   | n                                                                                                                                                                                | F or t value                                                   | p value           |
|---------------------------------|--------------------------------------------------------|----------------------------------------------------------------------------------------------------------------------------------------------------------------------------------|----------------------------------------------------------------|-------------------|
| <b>1D</b>                       | Two-way mixed-model ANOVA                              | 6 mice/group                                                                                                                                                                     | F (29,290) = 5.94 ablation x day                               | < 0.0001          |
|                                 | Bonferroni post-test                                   | 6 mice/group                                                                                                                                                                     | day 30                                                         | 0.002             |
| <b>1E</b>                       | ANCOVA (daily food intake)                             | 6 mice/group                                                                                                                                                                     | F (1,284) = 36.96                                              | < 0.0001          |
|                                 | Student's <i>t</i> -test (cumulative food intake)      | 6 mice/group                                                                                                                                                                     | t(10) = 2.41                                                   | 0.037             |
| <b>1F</b>                       | Student's <i>t</i> -test                               | 6 mice/group                                                                                                                                                                     | t(10) = 2.38                                                   | 0.039             |
| <b>1G</b>                       | Two-way mixed-model ANOVA                              | 6 mice/group                                                                                                                                                                     | F (29,290) = 0.61 ablation x day                               | 0.95              |
| <b>1H</b>                       | ANCOVA (daily food intake)                             | 6 mice/group                                                                                                                                                                     | F (1,284) = 0.017                                              | 0.9               |
|                                 | Student's <i>t</i> -test (cumulative food intake)      | 6 mice/group                                                                                                                                                                     | t(10) = 0.11                                                   | 0.91              |
| <b>1I</b>                       | Student's <i>t</i> -test                               | 6 mice/group                                                                                                                                                                     | t(10) = 0.33                                                   | 0.75              |
| <b>1K</b>                       | Two-way repeated-measures ANOVA                        | 8 YFP mice                                                                                                                                                                       | F (4,28) = 4.78 block x CS                                     | 0.0046            |
|                                 |                                                        | 8 YFP mice                                                                                                                                                                       | F (4,28) = 6.93 block                                          | 0.0005            |
|                                 |                                                        | 8 YFP mice                                                                                                                                                                       | F (1,7) = 15.50 CS                                             | 0.0056            |
|                                 | Bonferroni post-test                                   | 8 YFP mice                                                                                                                                                                       | block 3                                                        | 0.0035            |
|                                 |                                                        | 8 YFP mice                                                                                                                                                                       | block 4                                                        | 0.0035            |
|                                 |                                                        | 8 YFP mice                                                                                                                                                                       | block 5                                                        | < 0.0001          |
| <b>1K</b>                       | Two-way repeated-measures ANOVA (Bonferroni post-test) | 8 taCasp3 mice                                                                                                                                                                   | F (1,7) = 19.84 CS                                             | 0.003             |
|                                 | Bonferroni post-test                                   | 8 taCasp3 mice                                                                                                                                                                   | block 5                                                        | 0.0004            |
| <b>1L</b>                       | Two-way repeated-measures ANOVA                        | 8 mice/group                                                                                                                                                                     | F (1,14) = 0.23 group                                          | 0.64              |
|                                 |                                                        | 8 mice/group                                                                                                                                                                     | F (4,56) = 0.83 group x block                                  | 0.51              |
| <b>1M</b>                       | Two-way repeated-measures ANOVA                        | 8 YFP mice                                                                                                                                                                       | F (4,28) = 3.40 block x CS                                     | 0.0219            |
|                                 | Bonferroni post-test                                   | 8 YFP mice                                                                                                                                                                       | block 4                                                        | 0.0273            |
|                                 |                                                        | 8 YFP mice                                                                                                                                                                       | block 5                                                        | 0.0027            |
|                                 | Two-way repeated-measures ANOVA                        | 7 taCasp3 mice                                                                                                                                                                   | F (4,24) = 1.26 block                                          | 0.31              |
|                                 |                                                        | 7 taCasp3 mice                                                                                                                                                                   | F (1,6) = 3.17 CS                                              | 0.13              |
|                                 |                                                        | 7 taCasp3 mice                                                                                                                                                                   | F (4,24) = 1.53 block x CS                                     | 0.23              |
|                                 | Bonferroni post-test                                   | 7 taCasp3 mice                                                                                                                                                                   | block 5                                                        | 0.5               |
| <b>1N</b>                       | Two-way repeated-measures ANOVA                        | 7–8 mice/group                                                                                                                                                                   | F (1,13) = 2.11 group                                          | 0.17              |
|                                 |                                                        | 7–8 mice/group                                                                                                                                                                   | F (4,52) = 0.32 group x block                                  | 0.87              |
| <b>2D</b>                       | Two-way mixed-model ANOVA                              | 5 LH <sup>VGAT</sup> :ChR2 and 7 LH <sup>VGAT</sup> :GFP mice                                                                                                                    | F (2, 20) = 8.64 group x epoch                                 | 0.002             |
|                                 | Bonferroni post-test                                   | 5 LH <sup>VGAT</sup> :ChR2 and 7 LH <sup>VGAT</sup> :GFP mice                                                                                                                    | stim epoch                                                     | 0.003             |
| <b>2E</b>                       | Two-way mixed-model ANOVA                              | 10 LH <sup>VGAT</sup> :NpHR and 7 LH <sup>VGAT</sup> :GFP                                                                                                                        | F (1, 15) = 12.87 group x epoch                                | 0.0027            |
|                                 | Bonferroni post-test                                   | 10 LH <sup>VGAT</sup> :NpHR and 7 LH <sup>VGAT</sup> :GFP                                                                                                                        | stim epoch                                                     | 0.005             |
| <b>2F</b>                       | Two-way mixed-model ANOVA                              | 5 LH <sup>LEPR</sup> :ChR2 and 8 LH <sup>LEPR</sup> :GFP                                                                                                                         | F (2,22) = 1.69 group x epoch                                  | 0.21              |
| <b>2G</b>                       | Two-way mixed-model ANOVA                              | 10 LH <sup>LEPR</sup> :NpHR and 8 LH <sup>LEPR</sup> :GFP                                                                                                                        | F (1,16) = 1.06 group x epoch                                  | 0.32              |
| <b>2H</b>                       | Student's <i>t</i> -test                               | 5 LH <sup>VGAT</sup> :ChR2 and 7 LH <sup>VGAT</sup> :GFP mice                                                                                                                    | t(10) = 6.40                                                   | <0.0001           |
| <b>2I</b>                       | Student's <i>t</i> -test                               | 10 LH <sup>VGAT</sup> :NpHR and 7 LH <sup>VGAT</sup> :GFP                                                                                                                        | t(15) = 2.19                                                   | 0.045             |
| <b>2J</b>                       | Student's <i>t</i> -test                               | 5 LH <sup>LEPR</sup> :ChR2 and 8 LH <sup>LEPR</sup> :GFP                                                                                                                         | t(11) = 5.26                                                   | 0.0003            |
| <b>2K</b>                       | Student's <i>t</i> -test                               | 10 LH <sup>LEPR</sup> :NpHR and 8 LH <sup>LEPR</sup> :GFP                                                                                                                        | t(16) = 3.26                                                   | 0.0049            |
| <b>3L</b>                       | Three-way ANOVA                                        | LH <sup>VGAT</sup> neurons: 107 pre-responsive, 63 cue-responsive, 152 reward-responsive; LH <sup>LEPR</sup> neurons: 63 pre-responsive, 50 cue-responsive, 85 reward-responsive | F (2, 514) = 0.1048 genotype x CS                              | 0.021             |
|                                 |                                                        |                                                                                                                                                                                  | F (2, 514) = 89.08 epoch x CS                                  | < 0.0001          |
|                                 | Bonferroni post-test                                   |                                                                                                                                                                                  | cue responsive, VGAT CS- vs LEPR CS- within groups, CS+ vs CS- | 0.017<br>< 0.0001 |
| <b>30</b>                       | Mann-Whitney <i>U</i> -test                            | 63 LH <sup>VGAT</sup> neurons, 50 LH <sup>LEPR</sup> neurons                                                                                                                     | U = 1072                                                       | 0.0034            |
| <b>4B</b>                       | Two-way repeated-measures ANOVA                        | 6 LH <sup>VGAT</sup> :GFP mice                                                                                                                                                   | F (2, 10) = 4.220 block x CS                                   | 0.0469            |
|                                 |                                                        |                                                                                                                                                                                  | F (2, 10) = 27.80 block                                        | < 0.0001          |
|                                 |                                                        |                                                                                                                                                                                  | F (1, 5) = 8.236 cs                                            | 0.035             |
|                                 | Bonferroni post-test                                   |                                                                                                                                                                                  | block 3                                                        | 0.0021            |
|                                 | Two-way repeated-measures ANOVA                        | 6 LH <sup>VGAT</sup> :ChR2 mice                                                                                                                                                  | F (2, 10) = 0.2443 block x CS                                  | 0.7878            |
|                                 |                                                        | F (2, 10) = 1.863 block                                                                                                                                                          | 0.2052                                                         |                   |
|                                 |                                                        | F (1, 5) = 0.6223 cs                                                                                                                                                             | 0.4659                                                         |                   |
| Two-way repeated-measures ANOVA | 8 LH <sup>VGAT</sup> :NpHR mice                        | F (2, 14) = 1.761 block x CS                                                                                                                                                     | 0.2078                                                         |                   |
|                                 |                                                        | F (2, 14) = 7.677 block                                                                                                                                                          | 0.0056                                                         |                   |
|                                 |                                                        | F (1, 7) = 0.1347 cs                                                                                                                                                             | 0.7245                                                         |                   |

| Figure | Test                            | n                                    | F or t value                         | p value              |
|--------|---------------------------------|--------------------------------------|--------------------------------------|----------------------|
| 4C     | Two-way mixed-model ANOVA       | 6–8 mice (see above)                 | F (4, 34) = 1.946 block x group      | 0.1252               |
|        |                                 |                                      | F (2, 34) = 15.59 block              | < 0.0001             |
|        |                                 |                                      | F (2, 17) = 2.215 group              | 0.1397               |
| 4D     | Two-way mixed-model ANOVA       | 6–8 mice (see above)                 | F (2, 17) = 0.2353 CS x group        | 0.7929               |
|        |                                 |                                      | F (1, 17) = 5.148 CS                 | 0.0366               |
|        |                                 |                                      | F (2, 17) = 1.522 group              | 0.2465               |
| 4E     | Two-way repeated-measures ANOVA | 8 LH <sup>LEPR</sup> :GFP mice       | F (2, 14) = 14.57 block x CS         | 0.0004               |
|        |                                 |                                      | F (2, 14) = 11.57 block              | 0.0011               |
|        |                                 |                                      | F (1, 7) = 1.306 CS                  | 0.2907               |
|        | Bonferroni post-test            |                                      | block 3                              | 0.0007               |
|        | Two-way repeated-measures ANOVA | 5 LH <sup>LEPR</sup> :ChR2 mice      | F (2, 8) = 0.1826 block x CS         | 0.8364               |
| 4F     | Two-way repeated-measures ANOVA | 5 LH <sup>LEPR</sup> :NpHR mice      | F (2, 8) = 22.10 block               | 0.0006               |
|        |                                 |                                      | F (1, 4) = 1.641 CS                  | 0.2695               |
|        |                                 |                                      | F (2, 8) = 0.2432 block x CS         | 0.7897               |
|        | Two-way repeated-measures ANOVA |                                      | F (2, 8) = 8.756 block               | 0.0097               |
|        |                                 |                                      | F (1, 4) = 2.186 CS                  | 0.2133               |
| 4G     | Two-way mixed-model ANOVA       | 5–8 mice (see above)                 | F (4, 30) = 2.772 block x group      | 0.0451               |
|        |                                 |                                      | F (2, 30) = 60.16 block              | < 0.0001             |
|        |                                 |                                      | F (2, 15) = 3.058 group              | 0.0769               |
|        | Bonferroni post-test            |                                      |                                      | GFP CS+ vs. ChR2 CS+ |
| 4H     | Two-way mixed-model ANOVA       | 5–8 mice (see above)                 | GFP CS+ vs. NpHR CS+                 | 0.2031               |
|        |                                 |                                      | F (2, 15) = 0.3393 CS x group        | 0.7176               |
|        |                                 |                                      | F (1, 15) = 9.114 CS                 | 0.0086               |
|        |                                 |                                      | F (2, 15) = 1.003 group              | 0.3901               |
| 4I     | Two-way repeated-measures ANOVA | 6 LH <sup>VGAT</sup> :GFP→VTA mice   | F (2, 10) = 3.777 block x CS         | 0.06                 |
|        |                                 |                                      | F (2, 10) = 8.120 block              | 0.008                |
|        |                                 |                                      | F (1, 5) = 9.170 CS                  | 0.0291               |
|        | Bonferroni post-test            |                                      | block 3                              | 0.0167               |
|        | Two-way repeated-measures ANOVA | 7 LH <sup>VGAT</sup> :ChR2→VTA mice  | F (2, 12) = 1.495 block x CS         | 0.2631               |
|        |                                 |                                      | F (2, 12) = 5.368 block              | 0.0216               |
| 4J     | Two-way repeated-measures ANOVA | 8 LH <sup>VGAT</sup> :ArchT→VTA mice | F (1, 6) = 2.387 CS                  | 0.1733               |
|        |                                 |                                      | F (2, 14) = 1.049 block x CS         | 0.3764               |
|        |                                 |                                      | F (2, 14) = 27.20 block              | < 0.0001             |
|        | Two-way mixed-model ANOVA       | 6–8 mice (see above)                 | F (1, 7) = 4.665 CS                  | 0.0676               |
|        |                                 |                                      | F (4, 36) = 0.6670 block x group     | 0.6191               |
|        |                                 |                                      | F (2, 36) = 84.31 block              | < 0.0001             |
| 4K     | Two-way mixed-model ANOVA       | 6–8 mice (see above)                 | F (2, 18) = 0.3933 group             | 0.6805               |
|        |                                 |                                      | F (2, 18) = 0.01010 CS x group       | 0.99                 |
|        |                                 |                                      | F (1, 18) = 7.209 CS                 | 0.0151               |
|        |                                 |                                      | F (2, 18) = 0.02622 group            | 0.9742               |
| 4L     | Two-way repeated-measures ANOVA | 7 LH <sup>LEPR</sup> :GFP→VTA mice   | F (2, 12) = 2.492 block x CS         | 0.1244               |
|        |                                 |                                      | F (2, 12) = 1.625 block              | 0.2374               |
|        |                                 |                                      | F (1, 6) = 19.50 CS                  | 0.0045               |
|        | Bonferroni post-test            |                                      | block 3                              | 0.0063               |
|        | Two-way repeated-measures ANOVA | 7 LH <sup>LEPR</sup> :ChR2→VTA mice  | F (2, 12) = 1.110 block x CS         | 0.3613               |
|        |                                 |                                      | F (2, 12) = 5.485 block              | 0.0203               |
|        |                                 |                                      | F (1, 6) = 1.418 CS                  | 0.2786               |
|        | Two-way repeated-measures ANOVA | 8 LH <sup>LEPR</sup> :ArchT→VTA mice | F (2, 14) = 6.834                    | 0.0085               |
|        |                                 |                                      | F (2, 14) = 16.31                    | 0.0002               |
|        |                                 |                                      | F (1, 7) = 10.80                     | 0.0134               |
| 4M     | Bonferroni post-test            |                                      | block 3                              | 0.0047               |
|        | Two-way mixed-model ANOVA       | 7–8 mice (see above)                 | F (4, 38) = 1.684 block x group      | 0.1738               |
|        |                                 |                                      | F (2, 38) = 28.41 block              | < 0.0001             |
|        | F (2, 19) = 0.1603 group        |                                      | 0.853                                |                      |
| 5C     | Two-way mixed-model ANOVA       | 7 mCherry, 5 hM3D, and 8 hM4D mice   | F (2, 19) = 5.080 CS x group         | 0.0171               |
|        |                                 |                                      | F (1, 19) = 7.805 CS                 | 0.0116               |
|        |                                 |                                      | F (2, 19) = 0.05602 group            | 0.9457               |
|        | Bonferroni post-test            |                                      | 8 LH <sup>LEPR</sup> :ArchT→VTA mice | CS+ vs CS-           |
| 5C     | Two-way mixed-model ANOVA       | 7 mCherry, 5 hM3D, and 8 hM4D mice   | F (4, 34) = 3.678 test x group       | 0.0136               |
|        |                                 |                                      | F (2, 34) = 9.364 test               | 0.0006               |
|        |                                 |                                      | F (2, 17) = 2.371 group              | 0.1235               |

| Figure    | Test                      | n                                  | F or t value                                            | p value  |
|-----------|---------------------------|------------------------------------|---------------------------------------------------------|----------|
|           | Bonferroni post-test      |                                    | LH <sup>LEPR</sup> :mCherry, pre vs post 2              | 0.0022   |
|           |                           |                                    | LH <sup>LEPR</sup> :hM3D mice, pre vs post 2            | 0.0023   |
|           |                           |                                    | LH <sup>LEPR</sup> :hM4D mice, pre vs post 2            | > 0.99   |
|           |                           |                                    | LH <sup>LEPR</sup> :mCherry vs LH <sup>LEPR</sup> :hM4D | 0.0049   |
|           |                           |                                    | LH <sup>LEPR</sup> :mCherry vs LH <sup>LEPR</sup> :hM3D | 0.0127   |
| <b>5D</b> | Two-way mixed-model ANOVA | 7 mCherry, 5 hM3D, and 8 hM4D mice | F (2, 17) = 0.3213 test x group                         | 0.7295   |
|           |                           |                                    | F (1, 17) = 332.2 test                                  | < 0.0001 |
|           |                           |                                    | F (2, 17) = 0.2684 group                                | 0.7677   |
|           | Bonferroni post-test      |                                    | all groups                                              | < 0.0001 |
| <b>5E</b> | Two-way mixed-model ANOVA | 8 mCherry and 10 hM4D mice         | F (3, 48) = 0.2117 test x group                         | 0.8878   |
|           |                           |                                    | F (3, 48) = 41.86 test                                  | < 0.0001 |
|           |                           |                                    | F (1, 16) = 0.2282 group                                | 0.6393   |
|           | Bonferroni post-test      |                                    | Pre (1) vs. Post (10) both groups                       | < 0.0001 |
|           |                           |                                    | Post (10) vs. Ext (23) mCherry mice                     | 0.008    |
|           |                           |                                    | Post (10) vs. Ext (23) hM4D mice                        | 0.0034   |
|           |                           |                                    | Ext (23) vs. Rnst (24) mCherry mice                     | 0.0475   |
|           |                           |                                    | Ext (23) vs. Rnst (24) hM4D mice                        | 0.0017   |
| <b>5F</b> | Two-way mixed-model ANOVA | 9 mice/group                       | F (3, 48) = 0.1062 cocaine x group                      | 0.9561   |
|           |                           |                                    | F (3, 48) = 39.54 cocaine                               | < 0.0001 |
|           |                           |                                    | F (1, 16) = 2.449 group                                 | 0.1372   |
| <b>5G</b> | Two-way mixed-model ANOVA | 10 mice/group                      | F (5, 90) = 1.591 day x group                           | 0.1706   |
|           |                           |                                    | F (5, 90) = 7.879 day                                   | < 0.0001 |
|           |                           |                                    | F (1, 18) = 6.411 group                                 | 0.0209   |
|           | Bonferroni post-test      |                                    | day 5                                                   | 0.0426   |
|           |                           |                                    | day 7                                                   | 0.0078   |
| <b>5H</b> | Two-way mixed-model ANOVA | 10 mice/group                      | F (3, 54) = 3.356 cocaine x group                       | 0.0254   |
|           |                           |                                    | F (3, 54) = 118.3 cocaine                               | < 0.0001 |
|           |                           |                                    | F (1, 18) = 4.938 group                                 | 0.0393   |
|           | Bonferroni post-test      |                                    | 32 mg/kg cocaine                                        | 0.0012   |
| <b>5I</b> | Two-way mixed-model ANOVA | 10 mice/group                      | F (3, 54) = 3.381                                       | 0.0247   |
|           |                           |                                    | F (3, 54) = 159.7                                       | < 0.0001 |
|           |                           |                                    | F (1, 18) = 4.971                                       | 0.0388   |
|           | Bonferroni post-test      |                                    | 32 mg/kg cocaine                                        | 0.0011   |

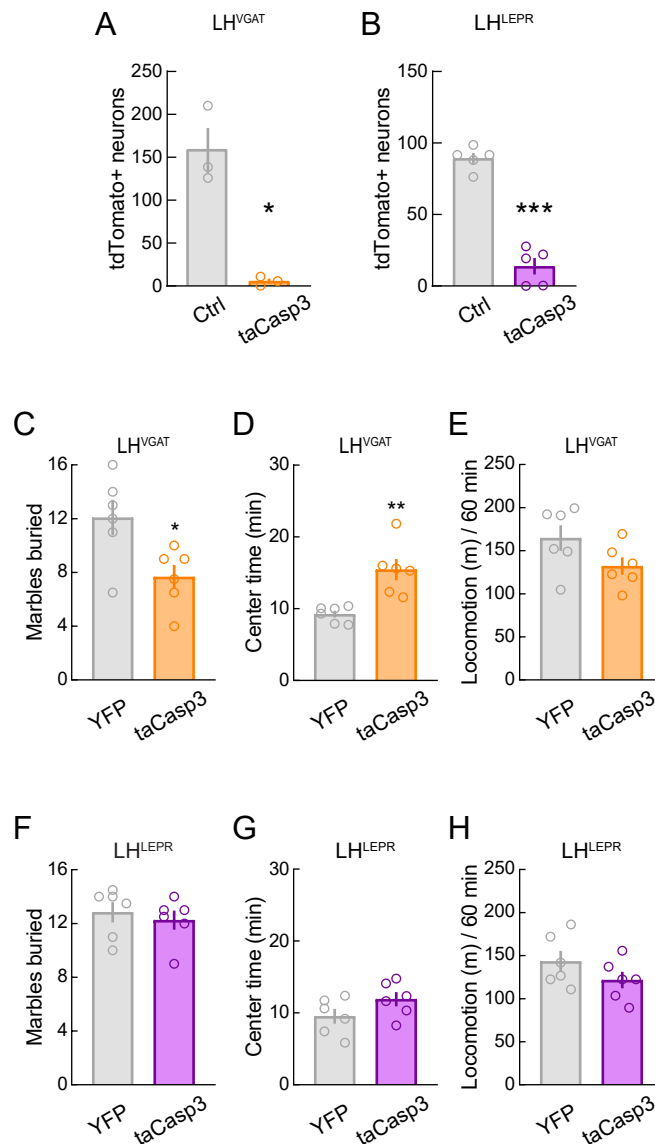

**Figure S1. Caspase ablation of LH<sup>VGAT</sup> and LH<sup>LEPR</sup> neurons. Related to Figure 1.**

(A) *Slc32a1<sup>Cre</sup>* mice for caspase virus validation were injected with a cocktail of Cre-dependent tdTomato and taCasp3 viruses in one hemisphere and Cre-dependent tdTomato virus diluted in PBS in the other hemisphere. Co-injection of Cre-ON viruses has been shown not to cause interference (Saunders et al., 2012). The tdTomato virus enabled visualization of intact LH<sup>VGAT</sup> neurons when injected with PBS versus ablated neurons injected with taCasp3 virus. Injection of taCasp3 virus significantly reduced the number of tdTomato+ LH<sup>VGAT</sup> neurons (Student's paired t-test,  $t(2) = 6.542$ ,  $*p = 0.0226$ ;  $n = 3$  mice, 3 sections counted per mouse).

**(B)** *Lepr<sup>Cre</sup>* mice for caspase virus validation were injected with Cre-dependent tdTomato and taCasp3 viruses in one hemisphere and tdTomato virus diluted in PBS in the other hemisphere. Note that injection of taCasp3 virus significantly reduced the number of tdTomato+ LH<sup>LEPR</sup> neurons (Student's paired t-test,  $t(4) = 12.44$ , \*\*\* $p = 0.0002$ ;  $n = 5$  mice, 3 sections counted per mouse).

**(C)** LH<sup>VGAT</sup>:taCasp3 mice buried fewer marbles than control mice ( $t(10) = 2.77$ ,  $p = 0.0196$ ;  $n = 6$  mice/group).

**(D)** LH<sup>VGAT</sup>:taCasp3 mice spent significantly more time in the center of the open field chamber than LH<sup>VGAT</sup>:YFP controls ( $t(10) = 4.00$ ,  $p = 0.0025$ ;  $n = 6$  mice/group).

**(E)** Similar 1 h open field locomotion was observed between LH<sup>VGAT</sup>:taCasp3 and LH<sup>VGAT</sup>:YFP mice ( $t(10) = 1.81$ ,  $p = 0.10$ ;  $n = 6$  mice/group).

**(F)** Marble burying in LH<sup>LEPR</sup>:taCasp3 mice was similar to LH<sup>LEPR</sup>:YFP mice ( $t(10) = 0.56$ ,  $p = 0.59$ ;  $n = 6$  mice/group).

**(G)** LH<sup>LEPR</sup>:taCasp3 mice did not differ from LH<sup>LEPR</sup>:YFP mice in open field center time ( $t(10) = 1.66$ ,  $p = 0.13$ ;  $n = 6$  mice/group).

**(H)** No differences in locomotion between the LH<sup>LEPR</sup>:taCasp3 and LH<sup>LEPR</sup>:YFP mice ( $t(10) = 1.40$ ,  $p = 0.19$ ;  $n = 6$  mice/group).

Data represented as mean  $\pm$  SEM.

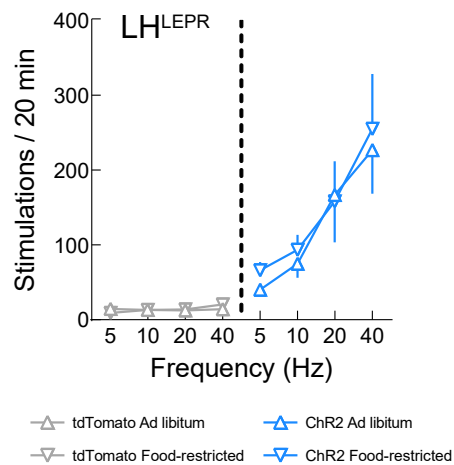

**Figure S2. Activation of LH<sup>LEPR</sup> neurons maintains operant self-stimulation. Related to Figure 2.**

Photostimulation of LH<sup>LEPR</sup> neurons maintained operant self-stimulation responding (n = 8 mice per group). Three-way ANOVA revealed significant main effects of frequency ( $F(3,42) = 9.93$ ,  $p < 0.0001$ ) and group ( $F(1,14) = 12.68$ ,  $p = 0.003$ ) but not feeding status ( $p = 0.29$ ), with a significant frequency  $\times$  group interaction ( $F(3,42) = 8.92$ ,  $p = 0.0001$ ). Data represented as mean  $\pm$  SEM.

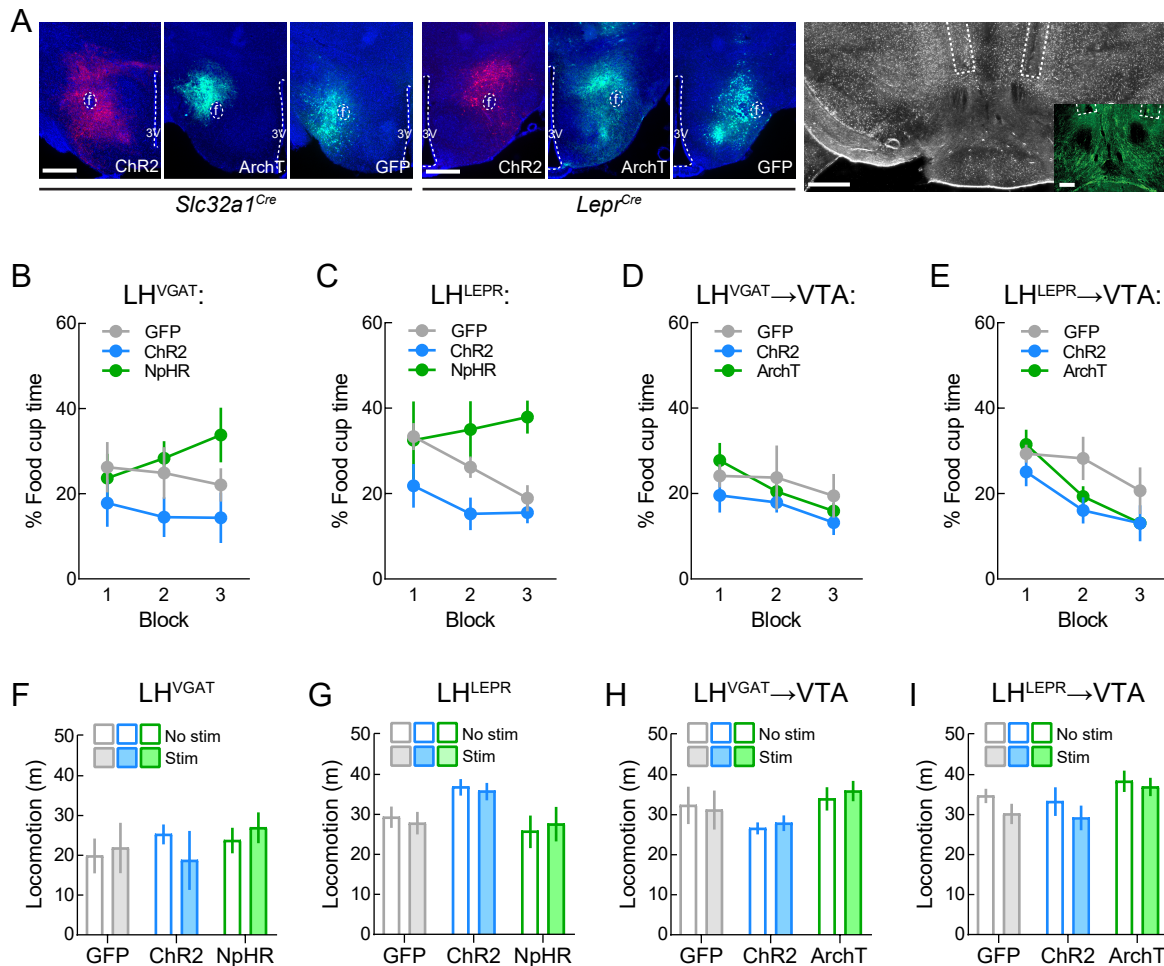

**Figure S3. Pre-CS responding and locomotion of mice used in Pavlovian conditioning experiments with optogenetics. Related to Figure 4.**

**(A)** *Left*, representative images of ChR2, ArchT, and GFP in the LH of *Slc32a1<sup>Cre</sup>* and *Lepr<sup>Cre</sup>* mice; Scale bars = 500  $\mu$ m. *Right*, representative image of optical fiber location above the VTA; Scale bars = 500  $\mu$ m and (inset) 200  $\mu$ m.

**(B)** Average food cup responding in the pre-CS period for LH<sup>VGAT</sup> mice (n = 6 LH<sup>VGAT</sup>:GFP mice, n = 6 LH<sup>VGAT</sup>:ChR2 mice, and n = 8 LH<sup>VGAT</sup>:NpHR mice, two-way mixed-model ANOVA group  $\times$  block interaction, p = 0.20).

**(C)** Average food cup responding in the pre-CS period for LH<sup>LEPR</sup> mice (n = 8 LH<sup>LEPR</sup>:GFP mice, n = 5 LH<sup>LEPR</sup>:ChR2 mice, and n = 5 LH<sup>LEPR</sup>:NpHR mice, two-way mixed-model ANOVA group  $\times$  block interaction, p = 0.14).



**(D)** Average food cup responding in the pre-CS period for LH<sup>VGAT</sup>→VTA mice (n = 6 LH<sup>VGAT</sup>:GFP→VTA mice, n = 7 LH<sup>VGAT</sup>:ChR2→VTA mice, and n = 8 LH<sup>VGAT</sup>:ArchT→VTA mice, two-way mixed-model ANOVA group × block interaction, p = 0.57).

**(E)** Average food cup responding in the pre-CS period for LH<sup>LEPR</sup>→VTA mice (n = 7 LH<sup>LEPR</sup>:GFP→VTA mice, n = 7 LH<sup>LEPR</sup>:ChR2→VTA mice, and n = 8 LH<sup>LEPR</sup>:ArchT→VTA mice, two-way mixed-model ANOVA group × block interaction, p = 0.29).

**(F)** Mice connected to patch cords were placed in novel open field chambers for 30 min and received photostimulation or photoinhibition in alternating, counterbalanced 3 min epochs. LH<sup>VGAT</sup> neuronal activation or inhibition did not evoke changes in locomotor activity (n = 6 LH<sup>VGAT</sup>:GFP mice, n = 6 LH<sup>VGAT</sup>:ChR2 mice, and n = 8 LH<sup>VGAT</sup>:NpHR mice, two-way mixed-model ANOVA group × stimulation interaction, p = 0.24).

**(G)** LH<sup>LEPR</sup> activation or inhibition did not trigger changes in locomotor activity (n = 8 LH<sup>LEPR</sup>:GFP mice, n = 5 LH<sup>LEPR</sup>:ChR2 mice, and n = 5 LH<sup>LEPR</sup>:NpHR mice, two-way mixed-model ANOVA group × stimulation interaction, p = 0.59).

**(H)** LH<sup>VGAT</sup>→VTA activation or inhibition did not evoke changes in locomotor activity (n = 6 LH<sup>VGAT</sup>:GFP→VTA mice, n = 7 LH<sup>VGAT</sup>:ChR2→VTA mice, and n = 8 LH<sup>VGAT</sup>:ArchT→VTA mice, two-way mixed-model ANOVA group × stimulation interaction, p = 0.76).

**(I)** No changes in locomotor activity were observed during LH<sup>LEPR</sup>→VTA activation or inhibition (n = 7 LH<sup>LEPR</sup>:GFP→VTA mice, n = 7 LH<sup>LEPR</sup>:ChR2→VTA mice, and n = 8 LH<sup>LEPR</sup>:ArchT→VTA mice, two-way mixed-model ANOVA group × stimulation interaction, p = 0.41).

Data represented as mean ± SEM.

### A Sucrose CPP

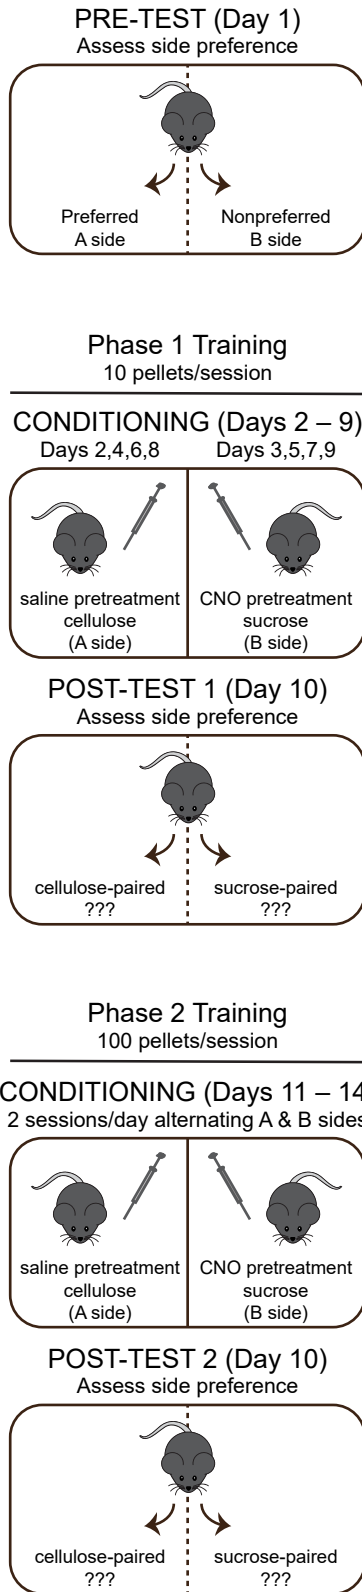

### B Cocaine CPP

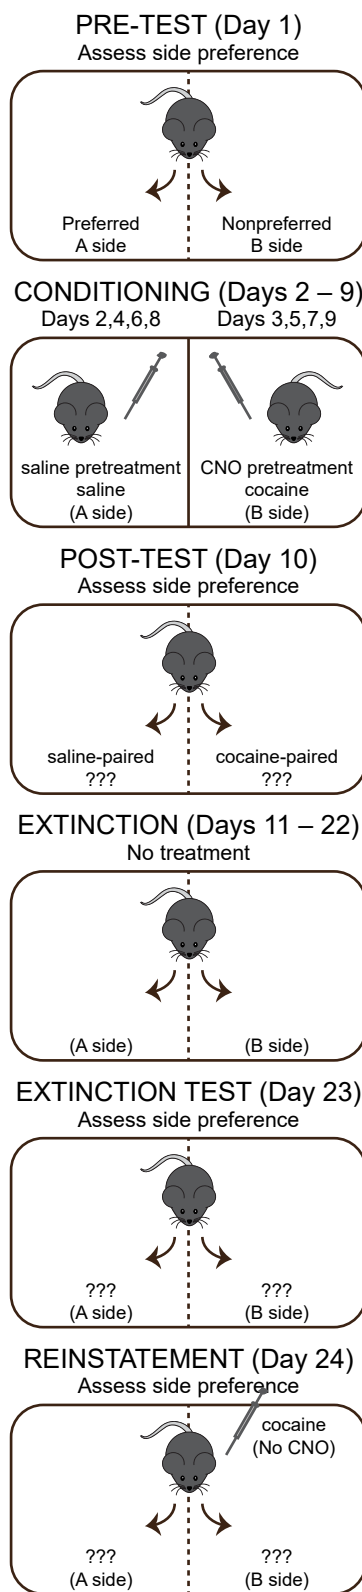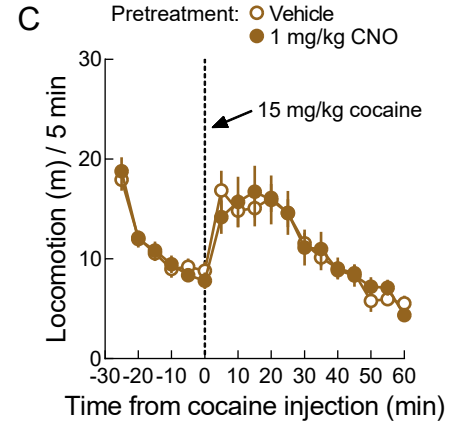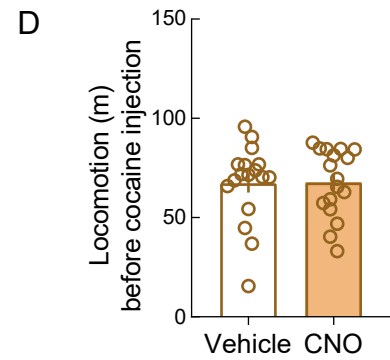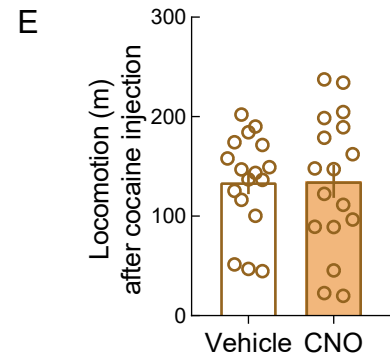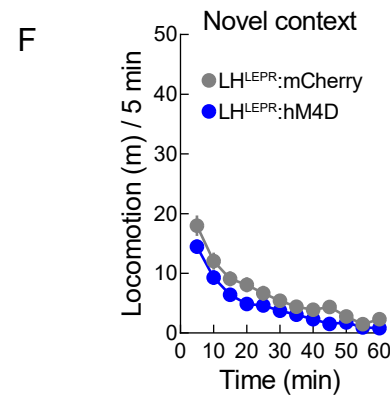

**Figure S4. Schematics and control experiments for conditioned place preference and locomotor sensitization. Related to Figure 5.**

**(A)** Schematic representation of the sucrose conditioned place preference experiment. Following the pre-test session, mice received “phase 1 training,” consisting of one training session per day for eight days with the center door closed and only one chamber accessible; these sessions were not recorded. On even days, mice received an injection of saline (i.p.) and were immediately placed on ‘side A’ for 30 min with access to ten 20-mg calorie-free, flavorless cellulose pellets. During odd days, mice received a 1 h pretreatment with 1 mg/kg CNO (i.p.) and were placed on ‘side B’ for 30 min with access to ten 20-mg sucrose pellets. After these eight conditioning sessions, a 15-min post-test was performed. Mice then received “phase 2 training,” which was similar to phase 1 training except that 100 sucrose pellets were offered during sucrose training sessions. After these eight conditioning sessions, a second 15-min post-test was performed.

**(B)** Schematic representation of the cocaine conditioned place preference experiment. During conditioning, pretreatment with CNO occurred 1 h before cocaine administration. After the pre-test session, mice received one training session per day for eight days with the center door closed and only one chamber accessible. On even days, mice received an injection of saline (i.p.) and were immediately placed on ‘side A’ for 30 min. During odd days, mice received a 1 h pretreatment with 1 mg/kg CNO (i.p.) before injection with 15 mg/kg cocaine (i.p.) and placed on ‘side B’ for 30 min. On day 10, untreated mice were placed back in the testing arena with free access to both chambers. For CPP extinction, mice were placed into the apparatus with access to both chambers for twelve 30-min sessions. Then, a 15-min extinction test was performed to verify a decrease in group preference for the cocaine-paired side to under 50%. The next day, for CPP reinstatement, 15 mg/kg cocaine (i.p.) was injected immediately prior to placing the mice in the apparatus with free access to both chambers.

**(C)** Time course of novel open field locomotion and locomotion induced by cocaine (15 mg/kg, i.p.) in wild type mice (n = 17 mice per group). CNO (1 mg/kg, i.p.) was administered 30 min prior to being placed in the novel chamber, and thus 60 min prior to cocaine administration.

**(D)** CNO did not affect novel open field locomotion (Student’s unpaired t-test,  $t(32) = 0.065$ ,  $p = 0.95$ ) or **(E)** cocaine-induced locomotion ( $t(32) = 0.052$ ,  $p = 0.96$ ) in wild-type mice.

**(F)** Chemogenetic inhibition of LH<sup>LEPR</sup> neurons did not affect novel open field locomotion (n = 10 mice per group). Two-way mixed-model ANOVA revealed a significant main effect of time ( $F(11,198) = 85.39$ ,  $p < 0.0001$ ) but not group ( $p = 0.10$ ) or group  $\times$  time interaction ( $p = 0.48$ ). Data represented as mean  $\pm$  SEM.
